# Supplementary material for: Combination of Radiomics Features and Functional Radiosensitivity Enhances Prediction of Acute Pulmonary Toxicity in a Prospective Validation Cohort of Patients with a Locally Advanced Lung Cancer Treated with VMAT-Radiotherapy
Source: MDPI journal article supplement (doi:10.3390/jpm12111926), 2022-11-18
Supplement: s1 [file s1]

## **SUPPLEMENTARY MATERIALS**

**Supplementary Table 1:** List of all studied dosimetric features

**Supplementary Table 2:** Main patients' characteristics in the training and testing sets

**Supplementary Table 3:** Correlation of each feature with the APT<sub>2</sub> risk (training cohort)

**Supplementary Table 4:** Analysis of the each model's discrimination between patients with or without APT  $\geq$  grade 3 in the training set

**Supplementary Table 5:** Analysis of the each model's discrimination between patients with or without APT  $\geq$  grade 3 in the testing set

**Supplementary Figure 1:** Overlap between the PmapRad and the Pmap maps

**Supplementary Figure 2:** Comparison between each model in the testing sets based on the precision-recall curve for the prediction of APT  $\geq$  grade 2

**Supplementary Figure 3:** Comparison between each model in the testing sets based on the calibration curve for the prediction of APT  $\geq$  grade 2

**Supplementary Figure 4:** Comparison between each model in the training (a) and testing (b) sets based on the ROC curve for the prediction of APT  $\geq$  grade 3

**Supplementary Figure 5:** Comparison between each model in the training (a) and testing (b) sets based on the Decision Curve Analysis for the prediction of APT  $\geq$  grade 3

**Supplementary Table 1:** List of all studied dosimetric features

|                         |
|-------------------------|
| Total Dose RT           |
| Vol <sub>GTV</sub>      |
| Vol <sub>CTV</sub>      |
| Vol <sub>PTV</sub>      |
| DMean <sub>Heart</sub>  |
| V30 <sub>Heart</sub>    |
| V40 <sub>Heart</sub>    |
| DMean <sub>2Lungs</sub> |
| V13 <sub>2Lungs</sub>   |
| V20 <sub>2Lungs</sub>   |
| V30 <sub>2Lungs</sub>   |
| DMax <sub>LungH</sub>   |
| DMean <sub>LungH</sub>  |
| V5 <sub>LungH</sub>     |
| V10 <sub>LungH</sub>    |
| V13 <sub>LungH</sub>    |
| V20 <sub>LungH</sub>    |
| V30 <sub>LungH</sub>    |
| DMax <sub>LungC</sub>   |
| DMean <sub>LungC</sub>  |
| V5 <sub>LungC</sub>     |
| V10 <sub>LungC</sub>    |
| V13 <sub>LungC</sub>    |
| V20 <sub>LungC</sub>    |
| V30 <sub>LungC</sub>    |

*Abbreviations: Vol: volume (mL), GTV: Gross Tumour Volume, CTV: Clinical Tumour Volume, PTV: Planning Tumour Volume, RT: Radiotherapy, DMean<sub>y</sub>: Mean Dose received by the y volume, DMax<sub>y</sub>: Maximum Dose received by the y volume, V<sub>xy</sub>: Volume of the y volume receiving x Gy, LungH: Homolateral Lung, LungC: Controlateral Lung, 2Lungs: both lungs*

**Supplementary Table 2:** Main patients' characteristics in the training and testing sets

|                                    | Training cohort<br>n = 165 |      | Testing cohort<br>n = 42 |      | <i>p</i> |
|------------------------------------|----------------------------|------|--------------------------|------|----------|
| <b>Age mean (SD)</b>               | 65.0 (9.38)                |      | 65.7 (10.03)             |      | 0.67     |
| <b>Gender</b>                      |                            |      |                          |      |          |
| Male (nb, %)                       | 111                        | 67.3 | 31                       | 73.8 | 0.42     |
| Female (nb, %)                     | 54                         | 32.7 | 11                       | 26.2 |          |
| <b>Median PS (range)</b>           | 1                          | 0-2  | 1                        | 0-2  | 0.06     |
| <b>Smoking</b>                     |                            |      |                          |      |          |
| Activ (nb, %)                      | 62                         | 37.6 | 17                       | 40.5 | 0.52     |
| Former/never (nb, %)               | 103                        | 62.4 | 25                       | 59.5 |          |
| <b>Known COPD (nb, %)</b>          | 63 (38.2)                  |      | 12 (28.6)                |      | 0.25     |
| <b>Mean MEVS (% , CI 95%)</b>      | 74.4 (71.1-77.6)           |      | 72.3 (65.7-78.9)         |      | 0.58     |
| <b>Histology</b>                   |                            |      |                          |      |          |
| SCC (nb, %)                        | 61                         | 37.0 | 16                       | 38.1 | 0.79     |
| ADC (nb, %)                        | 67                         | 40.6 | 17                       | 40.5 |          |
| SCLC (nb, %)                       | 24                         | 14.5 | 6                        | 14.3 |          |
| Others (nb, %)                     | 13                         | 7.9  | 3                        | 7.1  |          |
| <b>AJCC stage (Median)</b>         | IIIA                       |      | IIIA                     |      | 0.70     |
| <b>Total RT Dose</b>               |                            |      |                          |      |          |
| Median (Gy, range)                 | 66.0 (54.0-66.0)           |      | 66.0 (54.0-66.0)         |      | 0.59     |
| <b>Chemotherapy sequence</b>       |                            |      |                          |      |          |
| Concomitant (nb, %)                | 53                         | 32.1 | 14                       | 33.3 | 0.99     |
| Induction (nb, %)                  | 48                         | 29.1 | 12                       | 28.6 |          |
| Induction + concomitant (nb, %)    | 34                         | 20.6 | 7                        | 16.7 |          |
| None (nb, %)                       | 30                         | 18.2 | 9                        | 21.4 |          |
| <b>Adjuvant durvalumab (nb, %)</b> | 16                         | 9.7  | 3                        | 9.5  | 0.78     |
| <b>APT rate (%)</b>                | 22.4                       |      | 19.1                     |      | 0.64     |

*Abbreviations: SD: Standard Deviation, nb: number, %: percentage, COPD: chronic obstructive pulmonary disease, MEVS: mean expiratory volume/second, SCC: squamous-cell carcinoma, ADC: adenocarcinoma, SCLC: small-cell lung cancer, AJCC: American Joint Commission on Cancer, RT: radiotherapy, APT: Acute pulmonary toxicity  $\geq$  grade 2*

**Supplementary Table 3:** Correlation of each feature with the APT risk (training cohort)

| <b>Feature</b>                    | <b>AUC</b> | <b><i>p</i></b> |
|-----------------------------------|------------|-----------------|
| Age                               | 0.52       | 0.70            |
| Gender                            | 0.52       | 0.66            |
| COPD                              | 0.57       | 0.15            |
| MEVS                              | 0.59       | 0.09            |
| Smoking status                    | 0.57       | 0.13            |
| AJCC Stage                        | 0.53       | 0.63            |
| Concomittant CT                   | 0.53       | 0.56            |
| Neoadjuvant CT                    | 0.52       | 0.71            |
| Neoadjuvant -><br>Concomittant CT | 0.53       | 0.38            |
| RT alone                          | 0.50       | 1.00            |
| Performance Status                | 0.55       | 0.27            |
| Total Dose RT                     | 0.51       | 0.82            |
| VolGTV                            | 0.62       | <b>0.03</b>     |
| VolCTV                            | 0.61       | <b>0.02</b>     |
| VolPTV                            | 0.62       | <b>0.01</b>     |
| DMeanHeart                        | 0.52       | 0.63            |
| V30Heart                          | 0.51       | 0.79            |
| V40Heart                          | 0.54       | 0.43            |
| DMean2Lungs                       | 0.60       | <b>0.04</b>     |
| V132Lungs                         | 0.56       | 0.25            |
| V202Lungs                         | 0.56       | 0.21            |
| V302Lungs                         | 0.59       | 0.07            |
| DMaxLungH                         | 0.51       | 0.86            |
| DMeanLungH                        | 0.60       | <b>0.04</b>     |
| V5LungH                           | 0.57       | 0.17            |
| V10LungH                          | 0.58       | 0.13            |
| V13LungH                          | 0.58       | 0.13            |
| V20LungH                          | 0.58       | 0.12            |
| V30LungH                          | 0.59       | 0.06            |
| DMaxLungC                         | 0.53       | 0.61            |
| DMeanLungC                        | 0.51       | 0.84            |
| V5LungC                           | 0.52       | 0.78            |
| V10LungC                          | 0.53       | 0.65            |
| V13LungC                          | 0.50       | 0.98            |
| V20LungC                          | 0.53       | 0.61            |
| V30LungC                          | 0.54       | 0.49            |
| DMeanPmap                         | 0.69       | <b>0.0005</b>   |
| LungH_Variance                    | 0.61       | <b>0.04</b>     |
| LungH_DVAR                        | 0.53       | 0.55            |
| LungH_Contrast                    | 0.53       | 0.57            |
| LungH_IC1                         | 0.50       | 0.96            |
| LungH_Entropy                     | 0.52       | 0.65            |
| Lungs_Energy                      | 0.52       | 0.79            |

*Abbreviations: COPD: Chronic Obstructive Pulmonary Disease, MEVS: mean expiratory volume/second, AJCC: American Joint Committee on Cancer, CT: Chemotherapy, GTV: Gross Tumour Volume, CTV: Clinical Tumour Volume, PTV: Planning Tumour Volume, RT: Radiotherapy,  $V_{xy}$ : Volume of the y volume receiving x Gy,  $DMean_y$ : Mean Dose received by the y volume,  $DMax_y$ : Maximum Dose received by the y volume, LungH: homolateral lung, Lungs: both lungs, LungH\_Variance: Variance extracted from the LungH volume on the Coocurrence matrix (Cooc), LungH\_DVAR: Difference Variance extracted from the LungH volume on the Cooc matrix, LungH\_Contrast: Contrast extracted from the LungH volume on the Cooc matrix, LungH\_ICI: Information measure of correlation extracted from the LungH volume on the Cooc matrix, LungH\_Entropy: Entropy extracted from the LungH volume on the Cooc matrix, LungH, Lungs\_Energy: Entropy extracted from the LungH volume on the Histogram.*

**Supplementary Table 4:** Analysis of the each model's discrimination between patients with or without APT  $\geq$  grade 3 in the training set

| Set                     | AUC  | p        | Cut-off | C-index | Se    | Sp   | BAcc | Number of patients, n (%)                            |                 |             |                                                       |               |              |
|-------------------------|------|----------|---------|---------|-------|------|------|------------------------------------------------------|-----------------|-------------|-------------------------------------------------------|---------------|--------------|
|                         |      |          |         |         |       |      |      | Below the cutoff<br>(Low risk of APT $\geq$ grade 3) |                 |             | Above the cutoff<br>(High risk of APT $\geq$ grade 3) |               |              |
|                         |      |          |         |         |       |      |      | Total                                                | Without APT     | With APT    | Total                                                 | Without APT   | With APT     |
| Rad <sub>NoSmote</sub>  | 0.90 | < 0.0001 | > 19%   | 0.87    | 100.0 | 74.4 | 87.2 | 116<br>(70.3%)                                       | 116<br>(100.0%) | 0<br>(0.0%) | 49<br>(29.7%)                                         | 40<br>(81.6%) | 9<br>(18.4%) |
| Rad <sub>Smote</sub>    | 0.82 | < 0.0001 | > 25%   | 0.82    | 88.9  | 75.0 | 82.0 | 118<br>(71.5%)                                       | 117<br>(99.2%)  | 1<br>(0.8%) | 47<br>(28.5%)                                         | 39<br>(83.0%) | 8<br>(17.0%) |
| Pmap <sub>NoSmote</sub> | 0.92 | < 0.0001 | > 89%   | 0.92    | 100.0 | 84.6 | 92.3 | 132<br>(80.0%)                                       | 132<br>(100.0%) | 0<br>(0.0%) | 33<br>(20.0%)                                         | 24<br>(72.7%) | 9<br>(27.3%) |
| Pmap <sub>Smote</sub>   | 0.91 | < 0.0001 | > 86%   | 0.92    | 100.0 | 84.6 | 92.3 | 132<br>(80.0%)                                       | 132<br>(100.0%) | 0<br>(0.0%) | 33<br>(20.0%)                                         | 24<br>(72.7%) | 9<br>(27.3%) |
| Comb <sub>NoSmote</sub> | 0.92 | < 0.0001 | > 91%   | 0.92    | 100.0 | 84.6 | 92.3 | 132<br>(80.0%)                                       | 132<br>(100.0%) | 0<br>(0.0%) | 33<br>(20.0%)                                         | 24<br>(72.7%) | 9<br>(27.3%) |
| Comb <sub>Smote</sub>   | 0.81 | < 0.0001 | > 89%   | 0.83    | 77.8  | 87.8 | 82.8 | 139<br>(84.2%)                                       | 137<br>(98.6%)  | 2<br>(1.4%) | 26<br>(15.8%)                                         | 19<br>(73.1%) | 7<br>(26.9%) |

*Abbreviations: AUC: Area under the Curve, Se: Sensitivity, Sp: Specificity, BAcc: Balanced Accuracy, APT: Acute Pulmonary Toxicity, Rad\_NoSmote: Radiomics-Model without Smote, Rad\_Smote: Radiomics-Model with Smote, Pmap\_NoSmote: Pmap-Model without Smote, Pmap\_Smote: Pmap-Model with Smote, Comb\_NoSmote: Combined-Model without Smote, Comb\_Smote: Combined-Model with Smote*

**Supplementary Table 5:** Analysis of the each model's discrimination between patients with or without APT  $\geq$  grade 3 in the testing set

| Set                     | AUC  | p        | Cut-off | C-index | Se    | Sp   | BAcc | Number of patients, n (%)                            |             |          |                                                       |             |           |
|-------------------------|------|----------|---------|---------|-------|------|------|------------------------------------------------------|-------------|----------|-------------------------------------------------------|-------------|-----------|
|                         |      |          |         |         |       |      |      | Below the cutoff<br>(Low risk of APT $\geq$ grade 3) |             |          | Above the cutoff<br>(High risk of APT $\geq$ grade 3) |             |           |
|                         |      |          |         |         |       |      |      | Total                                                | Without APT | With APT | Total                                                 | Without APT | With APT  |
| Rad <sub>NoSmote</sub>  | 0.52 | 0.91     | > 19%   | 0.65    | 100.0 | 30.0 | 65.0 | 30 (71.4%)                                           | 28 (93.3%)  | 2 (6.7%) | 12 (28.6%)                                            | 12 (100.0%) | 0 (0.0%)  |
| Rad <sub>Smote</sub>    | 0.85 | 0.0001   | > 25%   | 0.89    | 100.0 | 77.5 | 88.8 | 31 (73.8%)                                           | 31 (100.0%) | 0 (0.0%) | 11 (26.2%)                                            | 9 (81.8%)   | 2 (18.2%) |
| Pmap <sub>NoSmote</sub> | 0.86 | < 0.0001 | > 89%   | 0.90    | 100.0 | 80.0 | 90.0 | 32 (76.2%)                                           | 32 (100.0%) | 0 (0.0%) | 10 (28.8%)                                            | 8 (80.0%)   | 2 (20.0%) |
| Pmap <sub>Smote</sub>   | 0.89 | < 0.0001 | > 86%   | 0.94    | 100.0 | 87.5 | 93.8 | 35 (83.3%)                                           | 35 (100.0%) | 0 (0.0%) | 7 (16.7%)                                             | 5 (71.4%)   | 2 (28.6%) |
| Comb <sub>NoSmote</sub> | 0.93 | < 0.0001 | > 91%   | 0.91    | 100.0 | 82.5 | 91.3 | 33 (78.6%)                                           | 33 (100.0%) | 0 (0.0%) | 9 (21.4%)                                             | 7 (77.8%)   | 2 (22.2%) |
| Comb <sub>Smote</sub>   | 0.88 | < 0.0001 | > 89%   | 0.86    | 100.0 | 72.5 | 86.3 | 29 (69.0%)                                           | 29 (100.0%) | 0 (0.0%) | 13 (31.0%)                                            | 11 (84.6%)  | 2 (15.4%) |

*Abbreviations: AUC: Area under the Curve, Se: Sensitivity, Sp: Specificity, BAcc: Balanced Accuracy, APT: Acute Pulmonary Toxicity, Rad\_NoSmote: Radiomics-Model without Smote, Rad\_Smote: Radiomics-Model with Smote, Pmap\_NoSmote: Pmap-Model without Smote, Pmap\_Smote: Pmap-Model with Smote, Comb\_NoSmote: Combined-Model without Smote, Comb\_Smote: Combined-Model with Smote*

**Supplementary Figure 1: Overlap between the PmapRad and the Pmap maps**

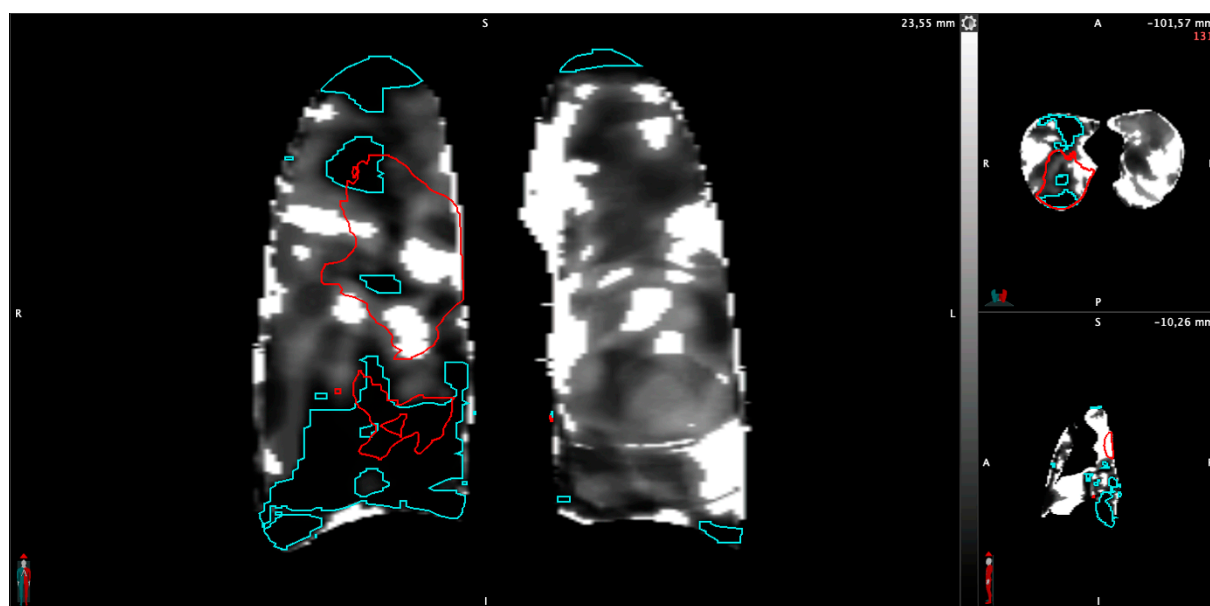

*Caption: Red: Pmap region, blue: PmapRad region*



**Supplementary Figure 2:** Comparison between each model in the testing sets based on the precision-recall curve for the prediction of  $\text{APT} \geq \text{grade 2}$

- a: Rad<sub>NoSmote</sub> model
- b: Rad<sub>Smote</sub> model
- c: Pmap<sub>NoSmote</sub> model
- d: Pmap<sub>Smote</sub> model
- e: Comb<sub>NoSmote</sub> model
- f: Comb<sub>Smote</sub> model

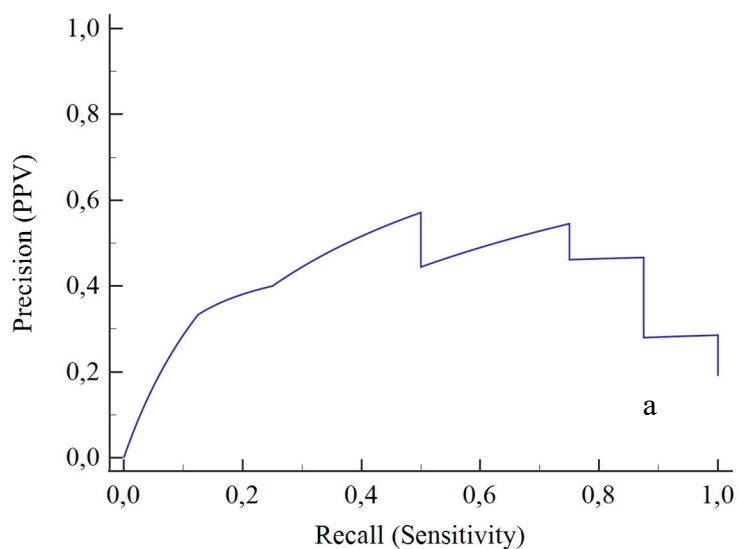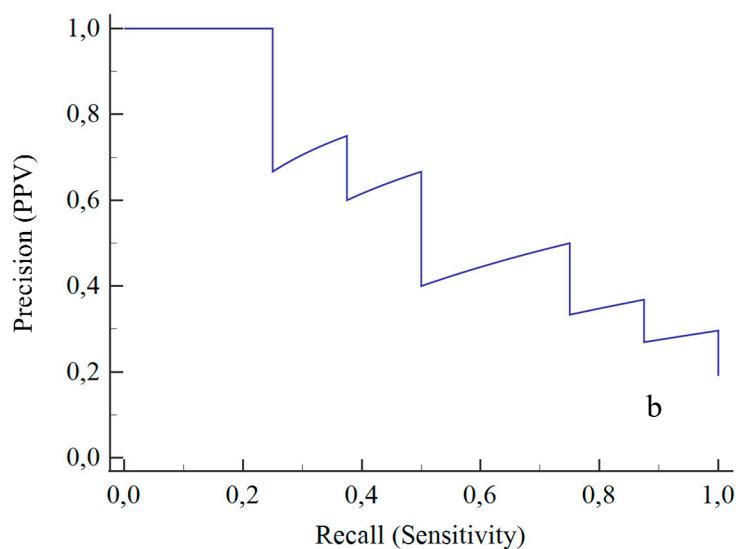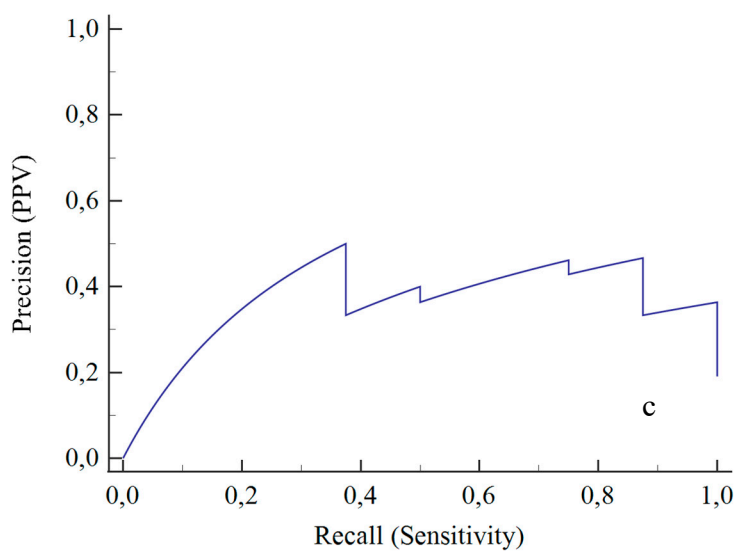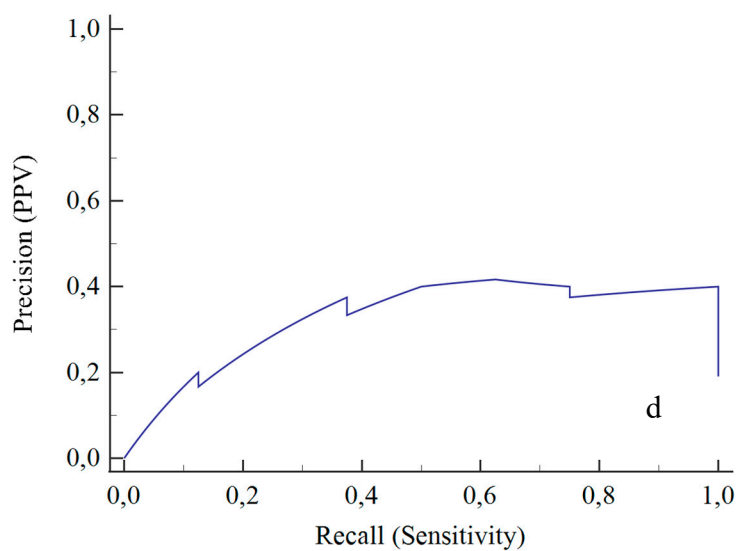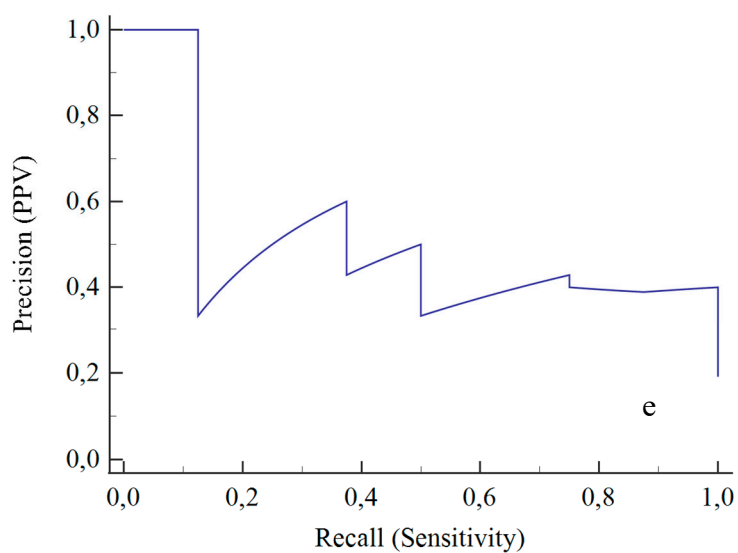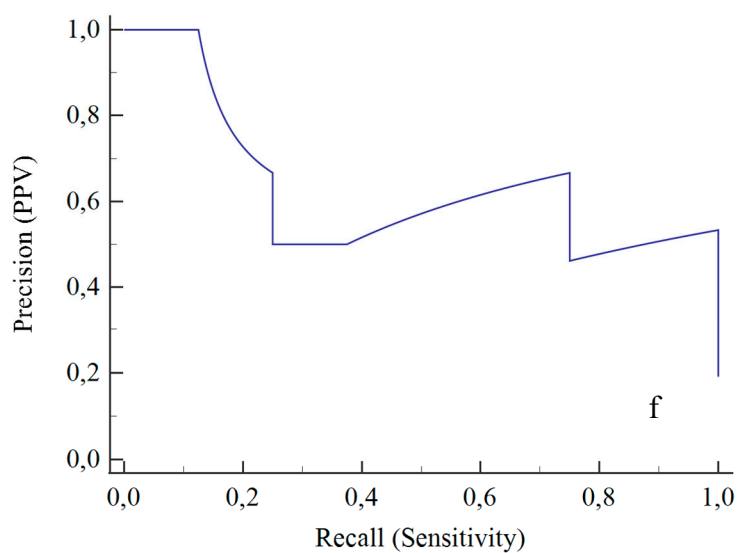

**Supplementary Figure 3:** Comparison between each model in the testing sets based on the calibration curve for the prediction of APT  $\geq$  grade 2

- a: Rad<sub>NoSmote</sub> model
- b: Rad<sub>Smote</sub> model
- c: Pmap<sub>NoSmote</sub> model
- d: Pmap<sub>Smote</sub> model
- e: Comb<sub>NoSmote</sub> model
- f: Comb<sub>Smote</sub> model

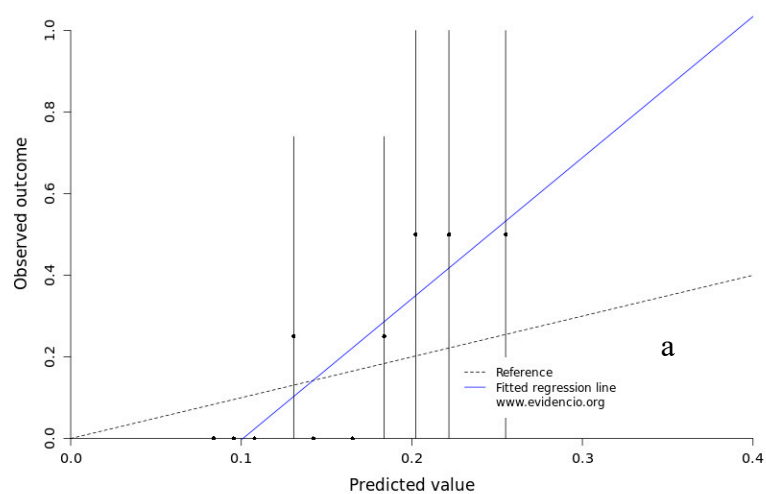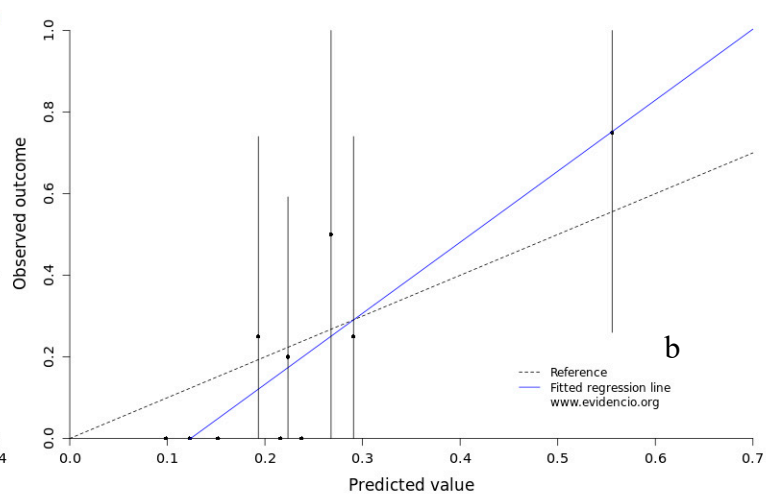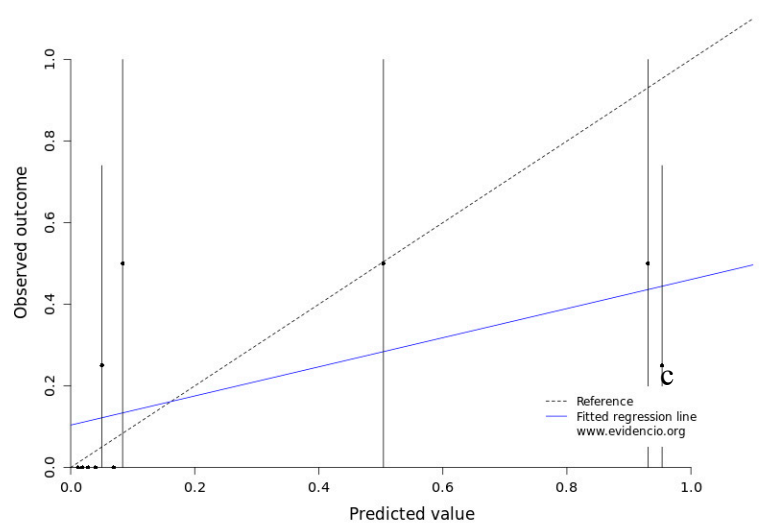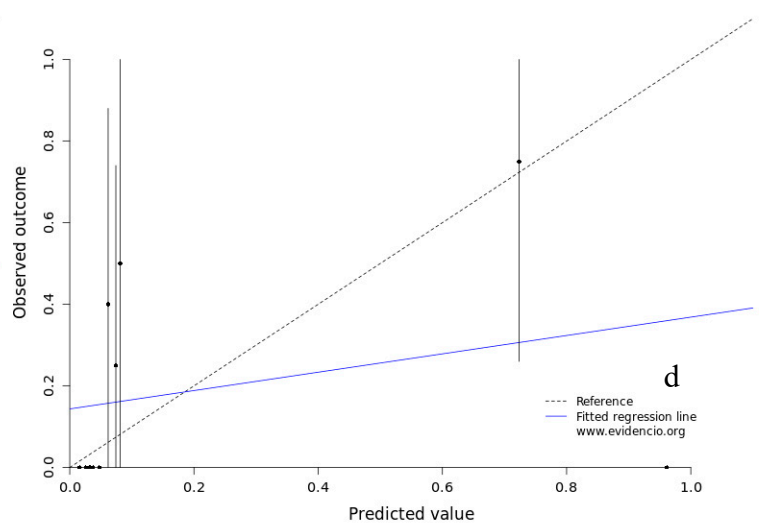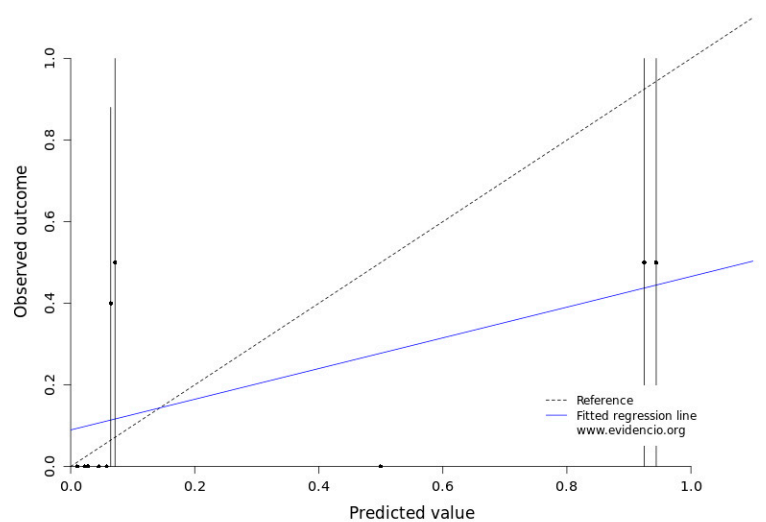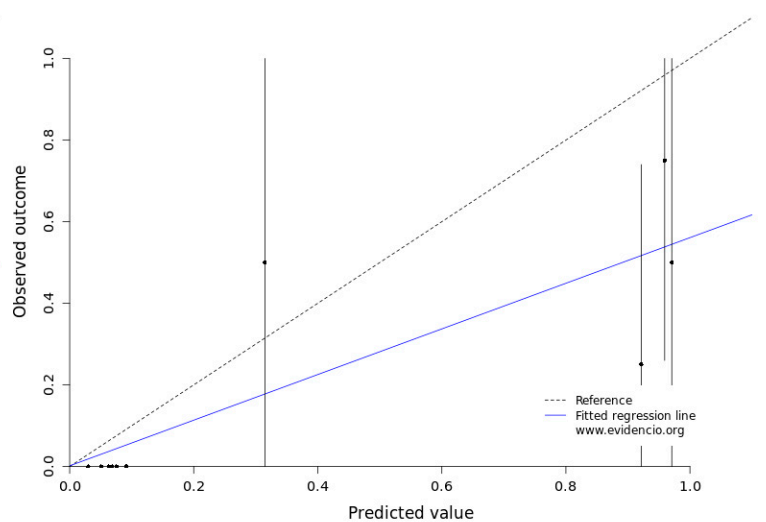

**Supplementary Figure 4:** Comparison between each model in the training (a) and testing (b) sets based on the ROC curve for the prediction of  $APT \geq \text{grade } 3$

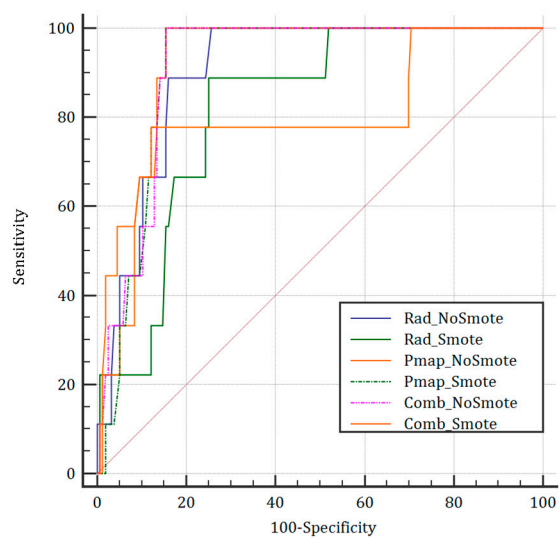

A

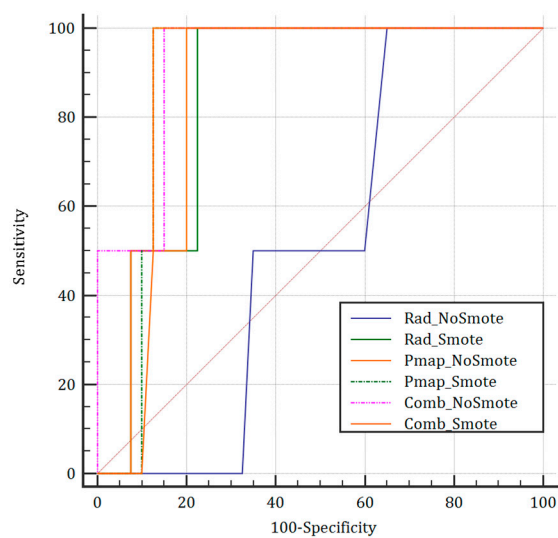

B

*Abbreviation: APT: Acute Pulmonary Toxicity, Rad\_NoSmote: Radiomics-Model without Smote, Rad\_Smote: Radiomics-Model with Smote, Pmap\_NoSmote: Pmap-Model without Smote, Pmap\_Smote: Pmap-Model with Smote, Comb\_NoSmote: Combined-Model without Smote, Comb\_Smote: Combined-Model with Smote*

**Supplementary Figure 5:** Comparison between each model in the training (a) and testing (b) sets based on the Decision Curve Analysis for the prediction of  $APT \geq \text{grade } 3$

A.

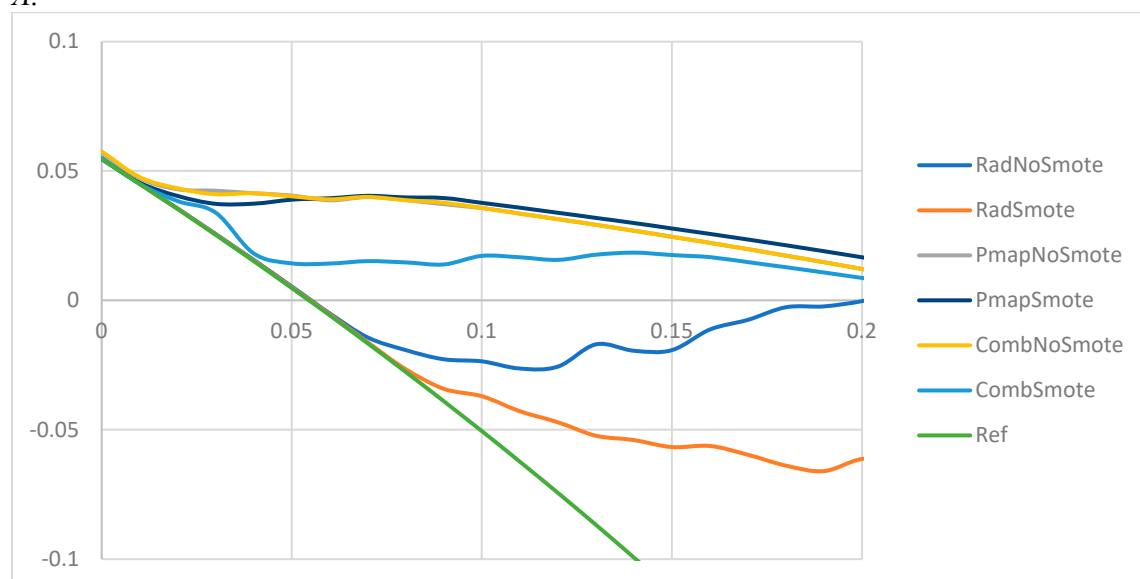

B.

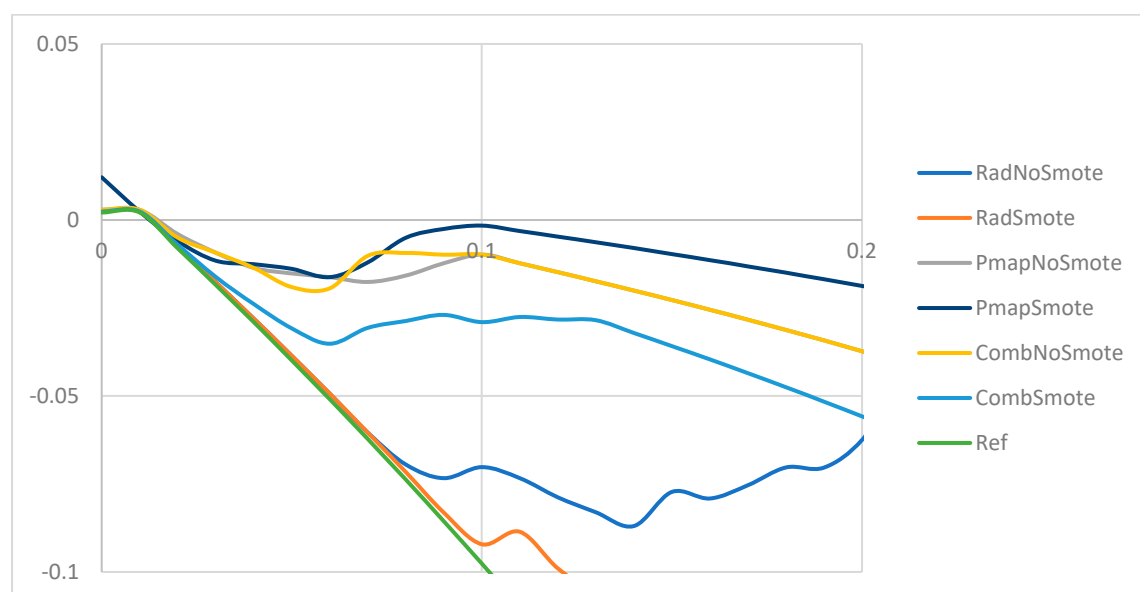

*Abbreviation: APT: Acute Pulmonary Toxicity, Rad\_NoSmote: Radiomics-Model without Smote, Rad\_Smote: Radiomics-Model with Smote, Pmap\_NoSmote: Pmap-Model without Smote, Pmap\_Smote: Pmap-Model with Smote, Comb\_NoSmote: Combined-Model without Smote, Comb\_Smote: Combined-Model with Smote*
